# Supplementary material for: Low eGFR Is a Strong Predictor of Worse Outcome in Hospitalized COVID-19 Patients
Source: MDPI journal article supplement (doi:10.3390/jcm10225224), 2021-11-09
Supplement: s1 [file s1]

## Supplementary Materials

**Table S1.** Results of Cox univariate regression analysis for variables associated with death (abbreviations: BMI: Body Mass Index; CCI: Charlson comorbidity index; GFR: Glomerular filtration rate; eGFR: Estimated GFR).

| Time to Death                             |                  |                |  |
|-------------------------------------------|------------------|----------------|--|
| Variable                                  | HR (95% CI)      | <i>p</i> Value |  |
| Age (per 5 years)                         | 1.33 (1.18–1.49) | <0.001         |  |
| Gender (M/F)                              | 1.10 (0.67–1.81) | 0.699          |  |
| BMI kg/m <sup>2</sup>                     | 1.03 (0.97–1.08) | 0.357          |  |
| CCI (points)                              | 1.33 (1.20–1.48) | <0.001         |  |
| Diabetes, <i>n</i> (%)                    | 2.12 (1.23–3.64) | 0.007          |  |
| Antiplatelet treatment, <i>n</i> (%)      | 1.76 (1.02–3.03) | 0.041          |  |
| Anti-hypertensive treatment, <i>n</i> (%) | 1.26 (0.77–2.06) | 0.366          |  |
| Serum creatinine (mg/dl)                  | 1.12 (0.98–1.28) | 0.093          |  |
| eGFR (per 10 mL/min/1.73 m <sup>2</sup> ) | 0.95 (0.90–1.00) | 0.071          |  |
| eGFR ≤ 60 mL/min/1.73 m <sup>2</sup>      | 2.12 (1.29–3.50) | 0.003          |  |
| Glycemia (mg/dl)                          | 1.01 (1–1.01)    | <0.001         |  |
| Triglycerides (mg/dl)                     | 1 (1–1.01)       | 0.350          |  |
| Cholesterol (mg/dl)                       | 1 (0.99–1.01)    | 0.889          |  |
| LDH (UI/l)                                | 1 (1–1)          | <0.001         |  |
| SpO <sub>2</sub> (%)                      | 0.91 (0.88–0.95) | <0.001         |  |

**Table S2.** Results of Cox univariate regression analysis for characteristics associated with admission to ICU (abbreviations: BMI: Body Mass Index; CCI: Charlson comorbidity index; GFR: Glomerular filtration rate; eGFR: Estimated GFR).

| Time to ICU                               |                  |                |  |
|-------------------------------------------|------------------|----------------|--|
| Variable                                  | HR (95%CI)       | <i>p</i> Value |  |
| Age (per 5 years)                         | 1.02 (1–1.05)    | 0.045          |  |
| Gender (M/F)                              | 1.7 (0.89–3.25)  | 0.105          |  |
| BMI kg/m <sup>2</sup>                     | 1.04 (0.97–1.11) | 0.242          |  |
| CCI (points)                              | 1.15 (1.02–1.29) | 0.003          |  |
| Diabetes, <i>n</i> (%)                    | 1.21 (0.58–2.53) | 0.619          |  |
| Antiplatelet treatment, <i>n</i> (%)      | 2.60 (1.39–4.87) | 0.002          |  |
| Anti-hypertensive treatment, <i>n</i> (%) | 1.50 (0.81–2.77) | 0.988          |  |
| Serum creatinine (mg/dl)                  | 1.38 (1.20–1.58) | 0.025          |  |
| eGFR (per 10 mL/min/1.73 m <sup>2</sup> ) | 0.90 (0.84–0.97) | 0.007          |  |
| eGFR ≤ 60 mL/min/1.73 m <sup>2</sup>      | 2.15 (1.16–4.01) | 0.015          |  |
| Glycemia (mg/dl)                          | 1 (1–1.01)       | 0.058          |  |
| Triglycerides (mg/dl)                     | 1 (0.99–1)       | 0.467          |  |
| Cholesterol (mg/dl)                       | 0.99 (0.97–1)    | 0.007          |  |
| LDH (UI/l)                                | 1 (1–1)          | 0.057          |  |
| SpO <sub>2</sub> (%)                      | 0.92 (0.88–0.96) | <0.001         |  |
